# Supplementary material for: 2-(2’-pyridyl)-4,6-diphenylphosphinine versus 2-(2’-pyridyl)-4,6- diphenylpyridine: An evaluation of their coordination chemistry towards Rh(I)
Source: Royal Society of Chemistry journal article supplement (doi:10.1039/c0nj00030b), 2010-01-01
Supplement: c0nj00030b.pdf [file c0nj00030b.pdf]

## **2-(2'-pyridyl)-4,6-diphenylphosphinine *versus* 2-(2'-pyridyl)-4,6-diphenylpyridine: An evaluation of their coordination chemistry towards Rh(I)**

Ariadna Campos Carrasco,<sup>b</sup> Evgeny A. Pidko,<sup>a</sup> Anna M. Masdeu-Bultó,<sup>b</sup> Martin Lutz,<sup>c</sup>  
Anthony L. Spek,<sup>c</sup> Dieter Vogt<sup>a</sup> and Christian Müller\*<sup>a</sup>

<sup>a</sup> *Schuit Institute of Catalysis, Department of Chemical Engineering and Chemistry, Eindhoven University of Technology, 5600 MB Eindhoven, The Netherlands. Fax: +31 40-2455054; Tel: +31-40-2474679; E-mail: [c.mueller@tue.nl](mailto:c.mueller@tue.nl)*

<sup>b</sup> *Departament de Química Física i Inorgànica, Universitat Rovira i Virgili, Marcel·lí Domingo s/n, 43007 Tarragona, Spain. Fax: 34 977559563; Tel: 34 977558779.*

<sup>c</sup> *Bijvoet Center for Biomolecular Research, Crystal and Structural Chemistry, Utrecht University, 3584 CH Utrecht, The Netherlands*

**Supplementary Material**

### General Remarks:

All manipulations were carried out under an argon atmosphere, using modified Schlenk techniques or in a MBraun dry box unless otherwise stated. All glassware was dried prior to use by heating under vacuum. All common solvents and chemicals were commercially available.  $[\text{Rh}(\text{cod})_2]\text{BF}_4$  and  $\text{NH}_3$  were purchased from STREM and Linde, respectively. 2-(2'-pyridyl)-4,6-diphenylphosphinine (**1**) was prepared according to the literature.<sup>[1]</sup> The solvents were taken from custom-made solvent purification columns filled with  $\text{Al}_2\text{O}_3$ . The elemental analyses were performed on a Perkin Elmer 2400, Series II CHNSO Analyzer within the Department of Chemical Engineering and Chemistry (TU/e). MALDI-TOF MS spectra were obtained using a Voyager-DE<sup>TM</sup> PRO Bio spectrometry<sup>TM</sup> Workstation (Applied Biosystems) time-of-flight mass spectrometer reflector.  $^1\text{H}$ ,  $^{13}\text{C}\{^1\text{H}\}$ ,  $^{31}\text{P}\{^1\text{H}\}$  and  $^{19}\text{F}\{^1\text{H}\}$  NMR spectra were recorded on a Varian Mercury 200 or 400 spectrometer and all chemical shifts are reported relative to the residual proton resonance in the deuterated solvents or referred to an 85% aqueous solution of  $\text{H}_3\text{PO}_4$ , respectively.

**Synthesis of 2-(2'-pyridyl)-4,6-diphenylpyridine (2):** Ligand **2** was prepared according to a modified literature-procedure. 2-(2'-pyridyl)-4,6-diphenylpyrylium tetrafluoroborate<sup>[1]</sup> (1.2 g, 3.0 mmol) was suspended in Me-THF (20 mL) and heated to  $T = 60^\circ\text{C}$ . A light stream of  $\text{NH}_3$  was bubbled through the reaction mixture for  $t = 30$  min and a yellow-orange suspension was formed. The solid was filtered off and MeOH (20 mL) was added to the yellow filtrate. An off-white solid was formed immediately, which was filtered off, washed with MeOH and dried under vacuum. Yield: 0.8 g (2.6 mmol, 87%). The analytical data of **2** are identical with those reported in literature.<sup>[2]</sup>

**Synthesis of  $[\text{Rh}(\text{cod})(\mathbf{1})]\text{BF}_4$  (3):**  $[\text{Rh}(\text{cod})_2]\text{BF}_4$  (37.3 mg, 0.092 mmol) and 2-(2'-pyridyl)-4,6-diphenylphosphinine (**1**) (30 mg, 0.092 mmol) was dissolved in  $\text{CH}_2\text{Cl}_2$  (2.0 mL). The dark red solution was stirred for 1h. Subsequently,  $\text{Et}_2\text{O}$  (6.0 mL) was added until a solid precipitated. The solution was decanted and the solid was dried under vacuum. Complex **3** was obtained as an orange-brown powder (37.6 mg, 0.06 mmol, 66%). Orange crystals of **3** suitable for X-ray diffraction and elemental analysis were obtained by slow crystallization from a mixture of  $[\text{Rh}(\text{cod})_2]\text{BF}_4$  (25 mg, 0.0615 mmol) and **1** (20 mg, 0.0615 mmol) in THF/ $\text{CH}_2\text{Cl}_2$  (2.0 mL) after filtration over Celite.  $^1\text{H}$  NMR (400 MHz,  $\text{CD}_2\text{Cl}_2$ ):  $\delta$  (ppm) = 2.26 (m, 4H,  $(\text{CH}_2)_{\text{COD}}$ ), 2.55 (m, 4H,  $(\text{CH}_2)_{\text{COD}}$ ), 5.31 (m, 4H,  $(\text{CH})_{\text{COD}}$ ), 7.50-7.70 (m, 10H), 7.74 (d, 2H,  $J_{\text{H-H}} = 8$  Hz), 8.17 (m, 2H), 8.26 (d, 1H,  $J_{\text{H-H}} = 8$  Hz), 8.57 (dd, 1H,  $J_{\text{H-P}} = 16$  Hz,

$J_{H-H} = 4$  Hz);  $^{19}\text{F}$  NMR (376.5 MHz,  $\text{CD}_2\text{Cl}_2$ ):  $\delta$  -149.7;  $^{31}\text{P}$  NMR (162 MHz,  $\text{CD}_2\text{Cl}_2$ ):  $\delta$  (ppm) = 175.5 (d,  $J_{P-Rh} = 188.6$  Hz).  $^{13}\text{C}$  NMR (50.3 MHz,  $\text{CD}_2\text{Cl}_2$ ):  $\delta$  (ppm) = 29.7 ( $(\text{CH}_2)_{\text{cod}}$ ), 107.5, 107.6 ( $(\text{CH})_{\text{cod}}$ ), 120.8 (d,  $J = 13.5$  Hz), 126.9, 127.6, 127.7, 127.9, 128.7, 129.3, 129.4, 129.6, 131.8 (d,  $J = 13.0$  Hz), 139.0 (m), 140.4, 141.5, 143.4, 151.7, 158.2 (m). MALDI-TOF (m/z): 575 [ $\text{M}^+ - \text{BF}_4 + \text{K}$ ], 536 [ $\text{M}^+ - \text{BF}_4$ ]. Anal. Calcd for  $\text{C}_{30}\text{H}_{28}\text{BF}_4\text{NPRh}$  ( $M = 623.24$  g/mol): C: 57.82; H: 4.53; N: 2.25. Found: C: 57.43; H: 4.48. N: 2.18.

**Synthesis of  $[\text{Rh}(\text{cod})_2]\text{BF}_4$  (**4**):**  $[\text{Rh}(\text{cod})_2]\text{BF}_4$  (26.3 mg, 0.065 mmol) and 2-(2'-pyridyl)-4,6-diphenylpyridine (**2**) (20 mg, 0.065 mmol) were dissolved in  $\text{CH}_2\text{Cl}_2$  (1.0 mL). The orange-red solution was stirred for 1h. Subsequently,  $\text{Et}_2\text{O}$  (5 mL) was added until a yellow solid precipitated. The solution was decanted and the solid was dried under vacuum. Complex **4** was obtained as an orange powder (37.6 mg, 0.06 mmol, 66%). Orange crystals of **4** suitable for X-ray diffraction and elemental analysis were obtained by slow diffusion of pentane into a mixture of  $[\text{Rh}(\text{cod})_2]\text{BF}_4$  (26.3 mg, 0.065 mmol) and **2** (20 mg, 0.065 mmol) in THF/ $\text{CH}_2\text{Cl}_2$  (2.0 mL) after filtration over Celite.  $^1\text{H}$  NMR ( $\text{CD}_2\text{Cl}_2$ )  $\delta$  (ppm) = 1.82 (d, b,  $J_{H-H} = 7.2$  Hz, 4H,  $(\text{CH}_2)_{\text{COD}}$ ), 2.27 (b, 4H,  $(\text{CH}_2)_{\text{COD}}$ ), 3.79 (b, 4H,  $(\text{CH})_{\text{COD}}$ ), 7.63 (m, 6H), 7.79 (m, 2H), 7.88 (s, 1H, cent. pyridine- $\text{H}_\beta$ ), 7.93 (m, 4H), 8.26 (t,  $J_{H-H} = 7.6$  Hz, 1H), 8.48 (d,  $J_{H-H} = 8.2$  Hz, 1H), 8.53 (s, 1H, cent. pyridine- $\text{H}_\beta$ ).  $^{19}\text{F}$  NMR ( $\text{CD}_2\text{Cl}_2$ ),  $\delta$  (ppm) = -152.6.  $^{13}\text{C}$  NMR (50.3 MHz,  $\text{CD}_2\text{Cl}_2$ ):  $\delta$  (ppm) = 29.7, 29.9 ( $(\text{CH}_2)_{\text{cod}}$ ), 84.6 (m,  $(\text{CH})_{\text{cod}}$ ), 118.8, 124.1, 126.8, 127.4, 128.6, 128.9, 129.2, 129.7, 130.9, 131.2, 135.4, 138.4, 140.7, 148.2, 153.3, 156.4, 164.2. Anal. Calcd for  $\text{C}_{30}\text{H}_{28}\text{BF}_4\text{N}_2\text{Rh}$  ( $M = 606.27$  g/mol): C: 59.43; H: 4.66; N: 4.62. Found: C: 59.24; H: 4.48. N: 4.38.

### X-ray crystal structure determinations

X-ray intensities were measured on a Nonius KappaCCD diffractometer with rotating anode (graphite monochromator,  $\lambda = 0.71073$  Å) at a temperature of 150(2) K. Data were integrated with the HKL2000<sup>[3]</sup> (compound **3**) or EVAL15<sup>[4]</sup> software (compound **4**) and corrected for absorption using SADABS<sup>[5]</sup>. The structures were solved with Direct Methods using the programs SIR-97<sup>[6]</sup> (compound **3**) and SHELXS-97<sup>[7]</sup> (compound **4**). Least-squares refinement was performed with SHELXL-97<sup>[7]</sup> on  $F^2$  of all reflections. Non-hydrogen atoms were refined with anisotropic displacement parameters. All hydrogen atoms were located in difference-Fourier maps. Hydrogen atoms at the double bonds of the *cod* ligands were refined freely with isotropic displacement parameters; all other hydrogen atoms were refined as rigid groups. Drawings, structure calculations and checking for higher symmetry were performed

with the PLATON software<sup>[8]</sup>.

**Compound 3:** [C<sub>30</sub>H<sub>28</sub>NPRh]BF<sub>4</sub> · 0.4(CH<sub>2</sub>Cl<sub>2</sub>), Fw = 657.19, orange plate, 0.21x0.12x0.02 mm<sup>3</sup>, triclinic, P  $\bar{1}$  (no. 2), a = 9.7987(2), b = 10.3575(2), c = 14.5382(3) Å, α = 84.8750(6), β = 85.4051(6), γ = 71.0572(8)°, V = 1387.95(5) Å<sup>3</sup>, Z = 2, D<sub>calc</sub> = 1.573 g/cm<sup>3</sup>, μ = 0.80 mm<sup>-1</sup>. 21889 Reflections were measured up to a resolution of (sin θ/λ)<sub>max</sub> = 0.65 Å<sup>-1</sup> of which 6367 were unique (R<sub>int</sub> = 0.044) and 5109 observed [I > 2σ(I)]. The CH<sub>2</sub>Cl<sub>2</sub> molecule was located close to an inversion center and refined with partial occupancy. Absorption correction range: 0.88-0.98. 377 Parameters were refined with one restraint. R1/wR2 [I > 2σ(I)]: 0.0396/0.0872, R1/wR2 [all refl.]: 0.0586/0.0949. S = 1.047. Δρ<sub>min/max</sub> = -0.47/1.03 eÅ<sup>3</sup>.

**Compound 4:** [C<sub>39</sub>H<sub>28</sub>N<sub>2</sub>Rh]BF<sub>4</sub>, Fw = 606.26, orange needle, 0.54x0.18x0.06 mm<sup>3</sup>, monoclinic, P2<sub>1</sub>/c (no. 14), a = 7.4699(7), b = 13.7427(12), c = 24.527(2) Å, β = 100.250(5)°, V = 2477.7(4) Å<sup>3</sup>, Z = 4, D<sub>calc</sub> = 1.625 g/cm<sup>3</sup>, μ = 0.74 mm<sup>-1</sup>. 61166 Reflections were measured up to a resolution of (sin θ/λ)<sub>max</sub> = 0.65 Å<sup>-1</sup> of which 5685 were unique (R<sub>int</sub> = 0.034) and 4994 observed [I > 2σ(I)]. Absorption correction range: 0.75-0.98. 359 Parameters were refined with no restraints. R1/wR2 [I > 2σ(I)]: 0.0232/0.0550, R1/wR2 [all refl.]: 0.0286/0.0574. S = 1.060. Δρ<sub>min/max</sub> = -0.43/0.75 eÅ<sup>3</sup>.

## References:

- [1] Müller C., Wasserberg D., Weemers J. J. M., Pidko E. A., Hoffmann S., Lutz M., Spek A. L., Meskers S. C. J., Janssen R. A., van Santen R. A., Vogt D., *Chem. Eur. J.*, **2007**, *13*, 4548.
- [2] Cave, G.W.V., Raston C.L., *J. Chem. Soc., Perkin Trans. 1*, **2001**, 3258.
- [3] Otwinowski, Z., Minor, W., *Methods in Enzymology, Volume 276* (C.W. Carter, Jr. & R.M. Sweet, Eds) Academic Press (1997) 307-326.
- [4] A.M.M. Schreurs, X. Xian, L.M.J. Kroon-Batenburg (2010). *J. Appl. Cryst.* **43**, in press. DOI: 10.1107/S0021889809043234.
- [5] Sheldrick, G. M. (1999). SADABS: Area-Detector Absorption Correction, v2.10, Universität Göttingen, Germany.
- [6] A. Altomare, M.C. Burla, M. Camalli, G.L. Cascarano, C. Giacovazzo, A. Guagliardi, A.G.G. Moliterni, G. Polidori, R. Spagna, *J. Appl. Cryst.* **1999**, *32*, 115-119.

[7] G. M. Sheldrick, *Acta Cryst.* **2008**, *A64*, 112-122.

[8] A.L. Spek, *Acta Cryst.* **2009**, *D65*, 148-155.
